# Supplementary material for: Zoonotic RVA: State of the Art and Distribution in the Animal World
Source: MDPI journal article supplement (doi:10.3390/v14112554), 2022-11-18
Supplement: s1 [file s1]

---

**Supplementary Materials:**

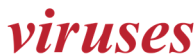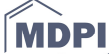

Table S1. Combination of G and P genotypes.

[illegible]





Table S2. VP7 genotypes.

[illegible]

Table S2. VP7 genotypes reported for each species.

Table S3. VP7 genotypes.

[illegible]





Table S4. VP6 genotypes.

[illegible]



Table S4. Partial Pigs constellations.

[illegible]

|                  |   |    |    |   |   |   |   |   |   |   |   |                        |                                              |
|------------------|---|----|----|---|---|---|---|---|---|---|---|------------------------|----------------------------------------------|
| CE-M-06-0003     | 2 | 27 | 14 | x | x | x | x | x | x | x | x | Canada                 | [154]                                        |
| CMP034           | 2 | 27 | 5  | x | x | x | x | x | x | 9 | 1 | Thailand               | [155]                                        |
| 103-P-004-1-0575 | 3 | 19 | 5  | x | x | x | x | x | x | x | x | Taiwan                 | [135]                                        |
| SCMY             | 3 | 13 | 5  | x | x | x | x | x | x | x | x | China; Taiwan          | MH320795-MH320797                            |
| 103-P-003-1-0429 | 3 | 13 | 12 | x | x | x | x | x | x | x | x | Taiwan                 | [135]                                        |
| P211             | 4 | 6  | 5  | x | x | x | x | x | x | x | x | Czech Republic         | [156]                                        |
| CE-M-05-0085     | 4 | 6  | 5  | x | x | x | x | x | x | 1 | x | Canada                 | [154]                                        |
| CE-M-05-0091     | 4 | 6  | 5  | x | x | x | x | x | x | 9 | x | Canada                 | [154]                                        |
| 103-P-004-1-0217 | 4 | 13 | 5  | x | x | x | x | x | x | x | x | Taiwan                 | [135]                                        |
| CE-M-06-0010     | 4 | 13 | 5  | x | x | x | x | x | x | 1 | x | Canada                 | [154]                                        |
| 103-P-003-1-1022 | 4 | 19 | 12 | x | x | x | x | x | x | x | x | Taiwan                 | [135]                                        |
| P70              | 4 | 25 | 1  | x | x | x | x | x | x | x | x | Czech Republic         | [156]                                        |
| 103-P-001-1-1323 | 5 | 23 | 5  | x | x | x | x | x | x | x | x | Taiwan                 | [135]                                        |
| CE-M-05-0081     | 5 | 27 | 5  | x | x | x | x | x | x | 1 | x | Canada                 | [154]                                        |
| CE-M-06-0005     | 5 | 6  | 5  | x | x | x | x | x | x | 1 | x | Canada                 | [154]                                        |
| P245             | 5 | 13 | 5  | x | x | x | x | x | x | x | x | Czech Republic; Taiwan | [156]                                        |
| HP140            | 6 | 13 | 2  | x | x | x | x | x | x | 1 | 1 | India                  | [157]                                        |
| 103-P-002-1-0514 | 9 | 13 | 12 | x | x | x | x | x | x | x | x | Taiwan                 | [135]                                        |
| 103-P-001-1-0127 | 9 | 13 | 5  | x | x | x | x | x | x | x | x | Taiwan                 | [135]                                        |
| LLP48            | 9 | 6  | 1  | x | x | x | x | 1 | x | 1 | x | China                  | KJ126815-KJ126825-KJ126820-KJ126830-KJ126835 |
| CE-M-05-0067     | 9 | 6  | 5  | x | x | x | x | x | x | 1 | x | Canada                 | [154]                                        |
| 1-4              | 9 | 19 | 5  | x | x | x | x | 1 | 1 | 1 | 1 | Taiwan                 | [135]                                        |
| P828             | 9 | 23 | 5  | x | x | x | x | x | x | 1 | x | Czech Republic; Taiwan | [156]                                        |

|  |                  |    |    |   |   |   |   |   |   |     |   |   |                                |                       |
|--|------------------|----|----|---|---|---|---|---|---|-----|---|---|--------------------------------|-----------------------|
|  | CE-M-06-0007     | 11 | 13 | 5 | x | x | x | x | x | x   | 9 | x | Canada;<br>Czech Re-<br>public | [154]                 |
|  | MRC-<br>DPRU3825 | 5  | x  | x | x | x | x | 8 | 1 | 1/7 | 1 | 1 | South<br>Africa                | KJ753135-<br>KJ753141 |

Table S4. Partial Pig strains' constellations reported for each hosts. Constellation's genes are coded as G: VP7; P[]: VP4; I: VP6 ;R: VP1;C: VP2;M: VP3;A: NSP4;N: NSP1;T: NSP2;E: NSP3; H: NSP5. Country where it was reported. Reference or NCBI accession number. Colors were arbitrarily defined from 1 - 14, and others are in white.
